# Supplementary material for: Solvent-induced supramolecular self-assembly in a solid-state A1/A2-difunctionlized pillar[5]arene host
Source: Royal Society of Chemistry journal article supplement (doi:10.1039/d4ce00771a), 2024-01-01
Supplement: d4ce00771a1.pdf [file d4ce00771a1.pdf]

## Supplementary Information

### Solvent induced supramolecular self-assembly in the solid-state of A1/A2-difunctionalized pillar[5]arene host

Mickey Vinodh, and Talal F. Al-Azemi\*

*Chemistry Department, Kuwait University, P.O. Box 5969, Safat 13060, Kuwait*

#### Table of contents

|                                                                                                      |     |
|------------------------------------------------------------------------------------------------------|-----|
| Single crystal X-ray diffraction analysis                                                            | S3  |
| Table S1. Crystallographic parameters of [Pillar-D1], [Pillar-D2], [Pillar ⊃ ADN1] & [Pillar ⊃ ADN2] | S4  |
| Figure S1. Thermal ellipsoid representation of the asymmetric unit of Pillar-D1                      | S5  |
| Figure S2. Thermal ellipsoid representation of the asymmetric unit of [Pillar ⊃ ADN1]                | S6  |
| Figure S3. Thermal ellipsoid representation of the asymmetric unit of Pillar-D2                      | S7  |
| Figure S4. Thermal ellipsoid representation of the asymmetric unit of [Pillar ⊃ ADN2]                | S8  |
| Pillar_D2: Refined in space group Cc against in space group C2/c                                     | S9  |
| Figure S5. Possible noncovalent interactions in the crystal of Pillar-D1                             | S11 |
| Table S2. Intermolecular non-bonding interactions in the Pillar-D1                                   | S11 |
| Figure S6. Possible noncovalent interactions in the crystal of [Pillar ⊃ ADN1].                      | S12 |
| Table S3. Intermolecular non-bonding interactions in the [Pillar ⊃ ADN1]                             | S12 |
| Figure S7. Possible noncovalent interactions in the crystal of Pillar-D2.                            | S13 |
| Table S4. Intermolecular non-bonding interactions in the Poly(Pillar-D2)                             | S13 |

|                                                                                                                                                                   |       |
|-------------------------------------------------------------------------------------------------------------------------------------------------------------------|-------|
| Figure S8. Possible noncovalent interactions between pillararene host and encapsulated adiponitrile in the crystal of [Pillar $\supset$ ADN2].                    | S14   |
| Figure S9. Possible noncovalent interactions of pillararene with adjacent pillararenes and the void filling adiponitrile molecules in [Pillar $\supset$ ADN2].    | S14   |
| Table S6. Intermolecular non-bonding interactions in the [Pillar $\supset$ ADN2]                                                                                  | S15   |
| Figures S10-13. Packing diagrams                                                                                                                                  | S16-8 |
| Figure S14. $^1\text{H}$ NMR spectra of Pillar and [Pillar $\supset$ ADN1].                                                                                       | S19   |
| Figure S15. $^1\text{H}$ NMR spectra of the Pillar [2c] daisy chain recorded in $\text{CDCl}_3$ and in $\text{CD}_2\text{Cl}_2$                                   | S20   |
| Figure S16. $^1\text{H}$ NMR spectra of Pillar in $\text{CDCl}_3$ and in $\text{DMF-}d_7$ .                                                                       | S20   |
| Figure S17. $^1\text{H}$ NMR spectra of equimolar solution of Pillar with adiponitrile (AND) in $\text{CDCl}_3$ , $\text{CD}_2\text{Cl}_2$ and $\text{DMF-}d_7$ . | S21   |
| Figure S18. $^1\text{H}$ NMR (in $\text{CD}_2\text{Cl}_2$ ) spectra of Pillar with different concentrations of adiponitrile (AND).                                | S21   |
| Figure S19. $^1\text{H}$ NMR (in $\text{DMF-}d_7$ ) spectra of Pillar with different concentrations of adiponitrile (AND).                                        | S22   |
| Figure S20. Net heat of complexation in chloroform of 10 mM solution of Pillar with adiponitrile as a function of injection after subtracting heat of dilution.   | S22   |
| Figure S21. Net heat of complexation (in DMF) of 10 mM solution of Pillar with adiponitrile as a function of injection after subtracting heat of dilution.        | S23   |
| Figure S22. Net heat of complexation (in DCM) of 10 mM solution of Pillar with adiponitrile as a function of injection after subtracting heat of dilution.        | S23   |
| References                                                                                                                                                        | S24   |

**Single crystal X-ray diffraction analysis:**

The asymmetric unit of **Pillar-D1** contain one molecule of Pillar co-crystalized with 2 molecules of chloroform and a half occupied tolualdehyde molecule at special position. One of the chloroform molecules exhibit positional disorder and this disorder has been handled with part commands during the crystal refinement (with 66% and 34% occupancies respectively). The tolualdehyde which is occupied at the special position too exhibited disorder with respect to CH<sub>3</sub> and CHO fragments and this disorder also handled by part command after assigning 50% occupancies to both fragments. The asymmetric unit of **Pillar-D2** contain two molecules of Pillar along with three and half molecules of DMF. The asymmetric unit of [**Pillar** ⊃ **ADN1**] contain one molecule of **Pillar** co-crystalized with a molecule of adiponitrile which is occupied at the cavity of the pillararene macrocycle. The n-bormodeoxy fraction of the pillararene is disordered in this crystal and this disorder is refined over two sites with 60% and 40% occupancies respectively. The encapsulated adiponitrile is also showed positional disorder which is refined with 80% and 20% occupancies respectively. The asymmetric unit of [**Pillar** ⊃ **ADN2**] contain one molecule of **Pillar** co-crystalized with a molecule of adiponitrile at the macrocyclic cavity along with another quarter occupancy of adiponitrile at spatial position. The propargyloxy group of the pillararene is disordered in this crystal and this disorder is refined over two sites with approximate 52% and 48% occupancies respectively. For the pictorial representation of the crystal's structures and their networks as well as for the quantitative calculation of intermolecular interactions those disordered fragments with higher occupancy have been only been considered.

**Table S1.** Summary on the nature and various crystallographic parameters of [Pillar-D1, Pillar-D2, [Pillar  $\supset$  ADN1] & [Pillar  $\supset$  ADN2] obtained after crystallization.

| Crystal sample                                                           | Pillar-D1                                                                          | Pillar-D2                                                                                                  | [Pillar $\supset$ ADN2]                                                                                    | [Pillar $\supset$ ADN1]                                          |
|--------------------------------------------------------------------------|------------------------------------------------------------------------------------|------------------------------------------------------------------------------------------------------------|------------------------------------------------------------------------------------------------------------|------------------------------------------------------------------|
| Chemical formula                                                         | C <sub>124</sub> H <sub>146</sub> Br <sub>2</sub> Cl <sub>12</sub> O <sub>21</sub> | C <sub>245</sub> H <sub>317</sub> Br <sub>4</sub> N <sub>7</sub> O <sub>47</sub>                           | C <sub>127</sub> H <sub>154</sub> Br <sub>2</sub> N <sub>5</sub> O <sub>20</sub>                           | C <sub>62</sub> H <sub>75</sub> BrN <sub>2</sub> O <sub>10</sub> |
| $M_r$                                                                    | 2557.62                                                                            | 4431.68                                                                                                    | 2230.36                                                                                                    | 1088.15                                                          |
| Crystal system, space group                                              | Monoclinic, $P2_1/c$                                                               | Monoclinic, $Cc$                                                                                           | Monoclinic, $C2/c$                                                                                         | Triclinic, $P-1$                                                 |
| Temperature (K)                                                          | 150                                                                                | 150                                                                                                        | 150                                                                                                        | 150                                                              |
| $a, b, c$ (Å)                                                            | 20.9763 (19),<br>12.9809 (10),<br>24.889 (2)                                       | 19.6591 (4),<br>16.4212 (4),<br>37.8641 (8)                                                                | 19.665 (2), 16.584<br>(2), 38.621 (4)                                                                      | 11.2957 (12),<br>12.2233 (12),<br>24.689 (3)                     |
| $\alpha, \beta, \gamma$ (°)                                              | 106.730 (8)                                                                        | 90, 90.487 (1), 90                                                                                         | 91.573 (6)                                                                                                 | 75.969 (5), 89.341<br>(6), 62.754 (4)                            |
| $V$ (Å <sup>3</sup> )                                                    | 6490.2 (10)                                                                        | 12223.1 (5)                                                                                                | 12591 (3)                                                                                                  | 2920.6 (5)                                                       |
| $Z$                                                                      | 2                                                                                  | 2                                                                                                          | 4                                                                                                          | 2                                                                |
| Radiation type                                                           | Mo $K\alpha$                                                                       | Cu $K\alpha$                                                                                               | Cu $K\alpha$                                                                                               | Mo $K\alpha$                                                     |
| $\mu$ (mm <sup>-1</sup> )                                                | 0.94                                                                               | 1.39                                                                                                       | 1.34                                                                                                       | 0.76                                                             |
| Crystal size (mm)                                                        | 0.20 × 0.19 × 0.03                                                                 | 0.21 × 0.19 × 0.11                                                                                         | 0.22 × 0.21 × 0.02                                                                                         | 0.09 × 0.07 × 0.05                                               |
| Diffractometer                                                           | Rigaku R-AXIS<br>RAPID                                                             | Bruker APEX-II<br>CCD                                                                                      | Bruker APEX-II<br>CCD                                                                                      | Rigaku R-AXIS<br>RAPID                                           |
| Absorption correction                                                    | Multi-scan<br><i>ABSCOR</i> (Rigaku,<br>1995)                                      | Multi-scan<br><i>SADABS2016/2</i> -<br>Bruker AXS area<br>detector scaling and<br>absorption<br>correction | Multi-scan<br><i>SADABS2016/2</i> -<br>Bruker AXS area<br>detector scaling and<br>absorption<br>correction | Multi-scan<br><i>ABSCOR</i> (Rigaku,<br>1995)                    |
| $T_{\min}, T_{\max}$                                                     | 0.223, 0.972                                                                       | 0.62, 0.87                                                                                                 | 0.52, 0.97                                                                                                 | 0.188, 0.963                                                     |
| No. of measured, independent & observed [ $I > 2\sigma(I)$ ] reflections | 49692, 11302, 4677                                                                 | 34180, 18068,<br>15880                                                                                     | 64117, 11138, 8125                                                                                         | 22026, 9923, 3156                                                |
| $R_{\text{int}}$                                                         | 0.100                                                                              | 0.027                                                                                                      | 0.068                                                                                                      | 0.103                                                            |
| $(\sin \theta/\lambda)_{\text{max}}$ (Å <sup>-1</sup> )                  | 0.595                                                                              | 0.595                                                                                                      | 0.597                                                                                                      | 0.595                                                            |
| $R[F^2 > 2\sigma(F^2)],$<br>wR(F <sup>2</sup> ), S                       | 0.090, 0.315, 0.98                                                                 | 0.057, 0.187, 1.04                                                                                         | 0.112, 0.347, 1.59                                                                                         | 0.104, 0.343, 1.01                                               |
| No. of reflections                                                       | 11302                                                                              | 18068                                                                                                      | 11138                                                                                                      | 9923                                                             |
| No. of parameters                                                        | 748                                                                                | 1388                                                                                                       | 731                                                                                                        | 741                                                              |
| No. of restraints                                                        | 66                                                                                 | 162                                                                                                        | 120                                                                                                        | 294                                                              |
| H-atom treatment                                                         | Constrained                                                                        | Constrained                                                                                                | Constrained                                                                                                | Constrained                                                      |
| $\Delta\rho_{\text{max}}, \Delta\rho_{\text{min}}$ (e Å <sup>-3</sup> )  | 0.55, -0.42                                                                        | 0.66, -0.44                                                                                                | 1.65, -1.30                                                                                                | 0.48, -0.36                                                      |

Computer programs: *SHELXL2019/2* (Sheldrick, 2019).

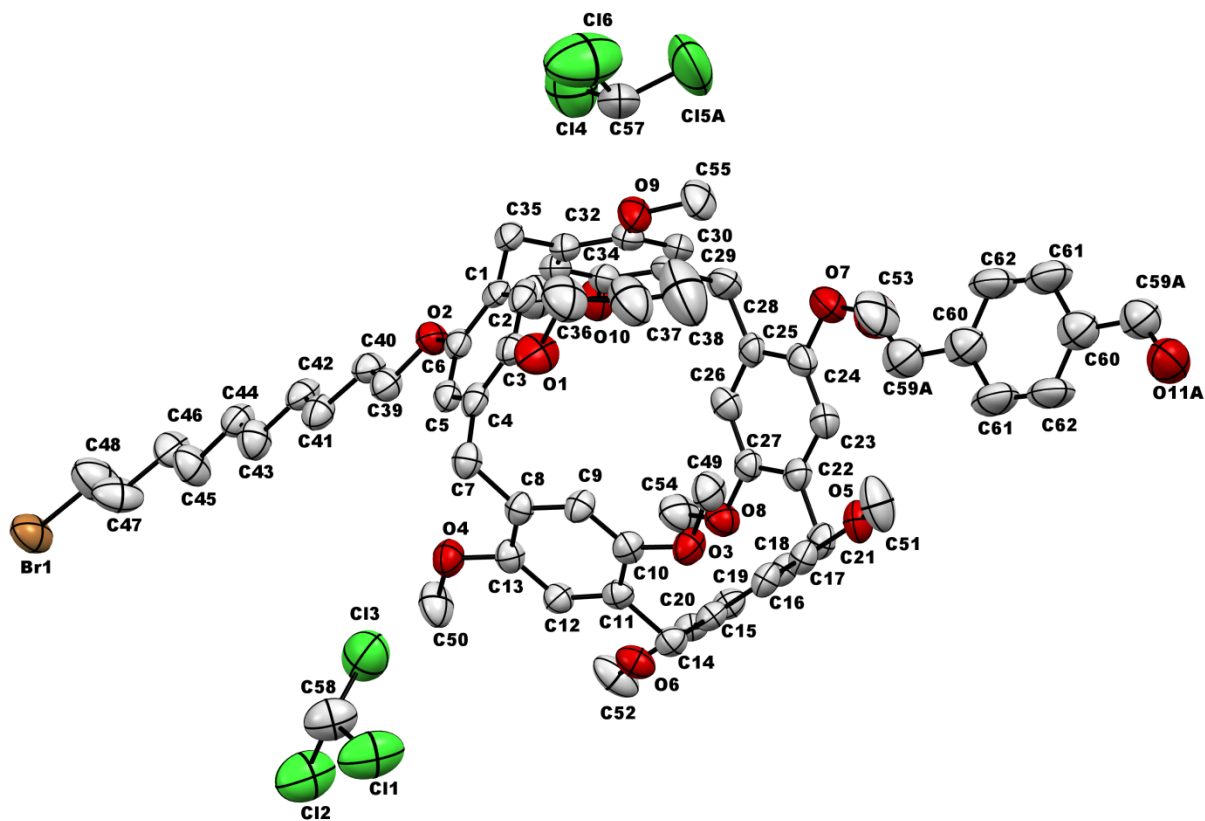

**Figure S1.** Thermal ellipsoid representation (30% probability) showing the asymmetric unit of **Pillar-D1** obtained after the crystallization from chloroform (Hydrogen atoms are hidden for clarity).

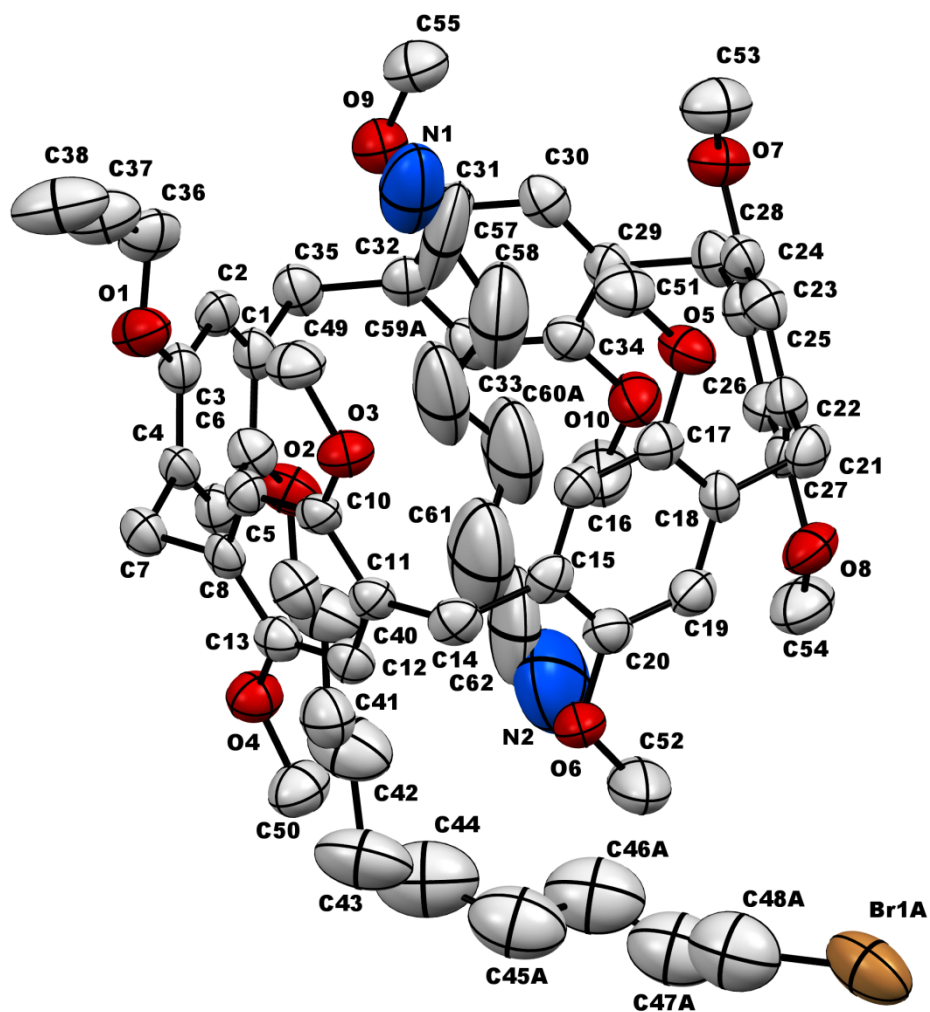

**Figure S2.** Crystal structure (thermal ellipsoid representation; 30% probability) of [Pillar  $\supset$  ADN1] obtained after the crystallization from chloroform and adiponitrile (Hydrogen atoms are hid for clarity).

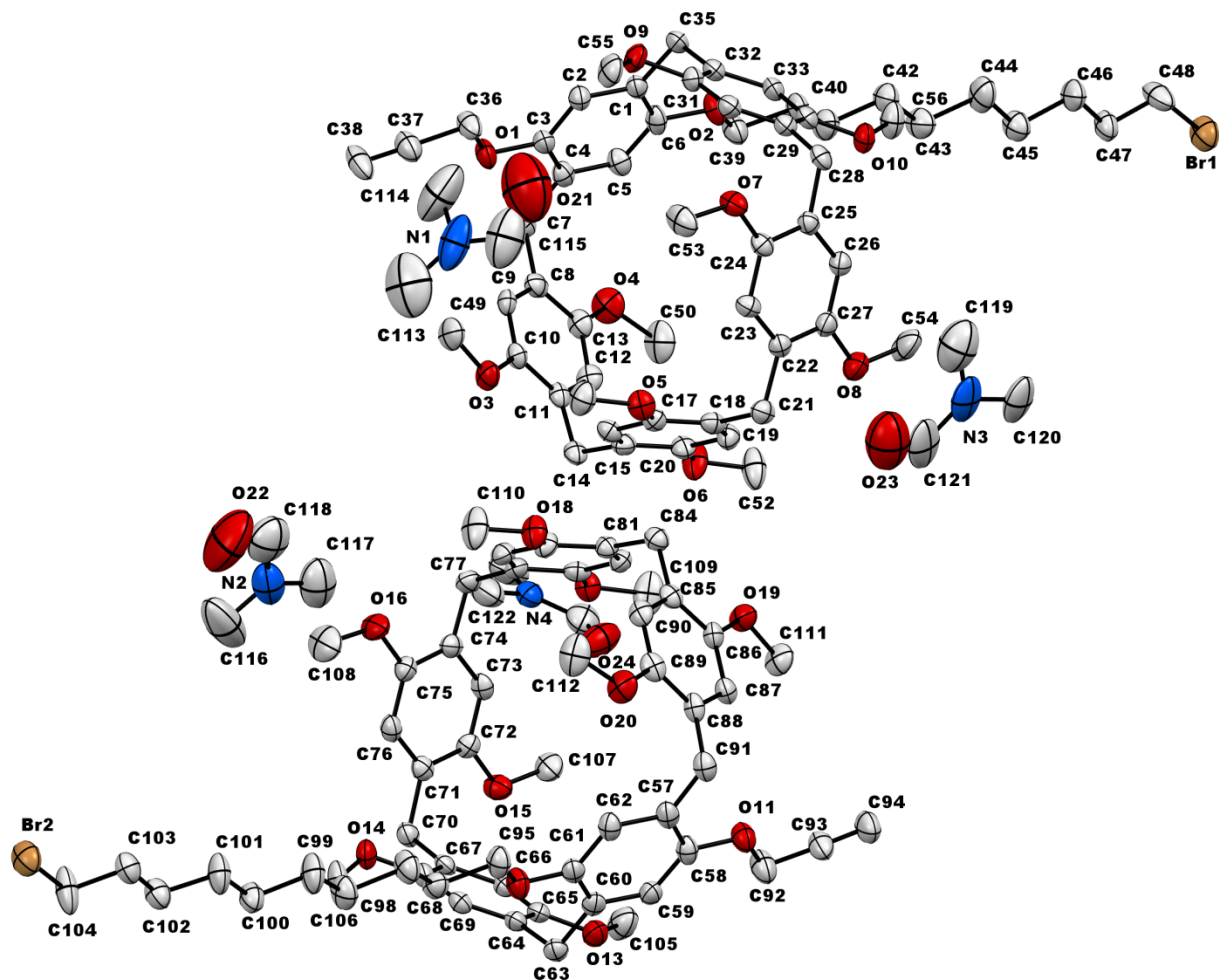

**Figure S3.** Thermal ellipsoid representation (30% probability) showing the asymmetric unit of **Pillar-D2** obtained after the crystallization from *N, N*-dimethyl formamide (Hydrogen atoms are hid for clarity).

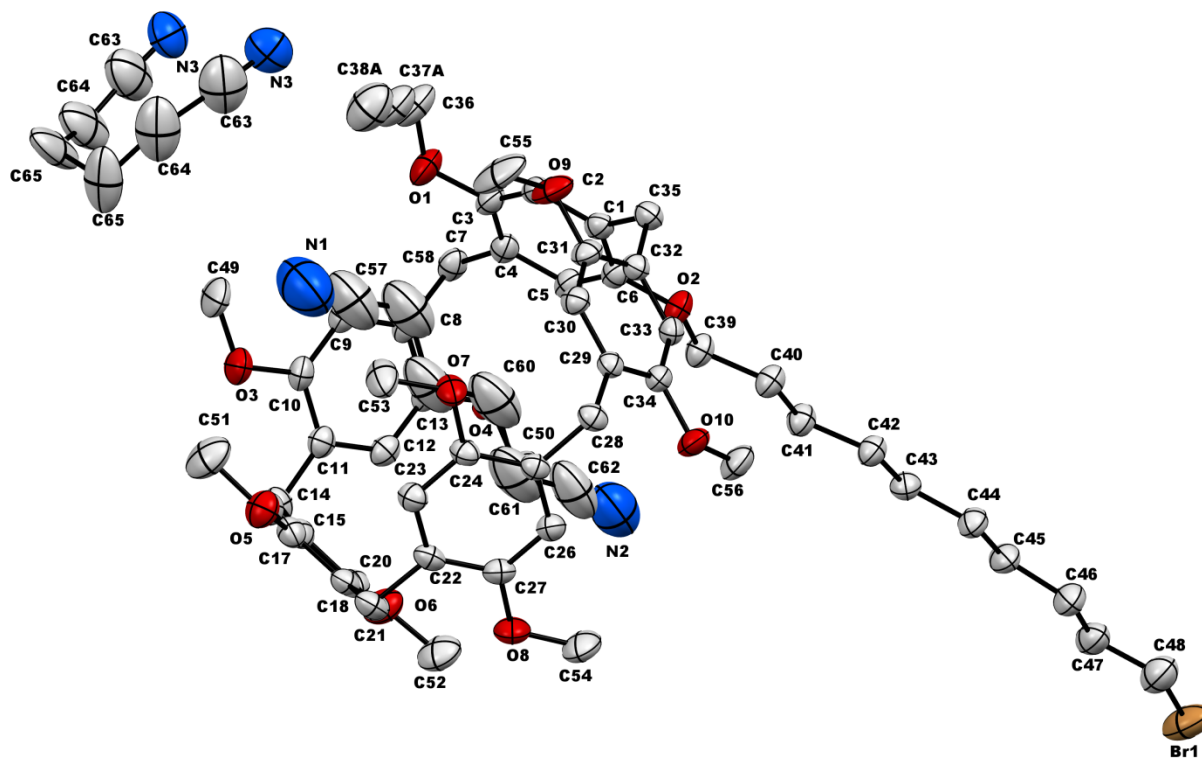

**Figure S4.** Crystal structure (thermal ellipsoid representation; 30% probability) of [Pillar  $\supset$  ADN2] obtained after the crystallization from *N,N*-dimethyl formamide and adiponitrile (Hydrogen atoms are hidden for clarity).



**Pillar\_D2: Refined in space group Cc against in space group C2/c**

The **Pillar-D2** crystal is better fit in space group C2/c with an inversion centre and one bromine-containing ligand in the asymmetric unit. However, in this article the crystal of **Pillar-D2** is reported in space group Cc with  $Z = 2$  and two bromine-containing ligands in the asymmetric unit as explained below.

In **Pillar-D2** crystal, the DMF acts as a mediator that joins two cyclic [c2] daisy pillararenes. As stated above, the Pillar-D2 crystal is better fit in space group C2/c. However, in the C2/c space group the mediator DMF molecule is occupied in the special position and its interaction with pillararene macrocycles could not established exactly (**Figure A**). At the same time this DMF molecule is no longer occupied in special position when the same crystal is refined in space group Cc and hence the supramolecular interactions of DMF with pillararene molecules are better explained ( via two C-H... $\pi$  (2.827 Å and 2.800 Å) and C-H...Br (2.822 Å) interactions) in the formation of the supramolecular polymer (**Figure B**).

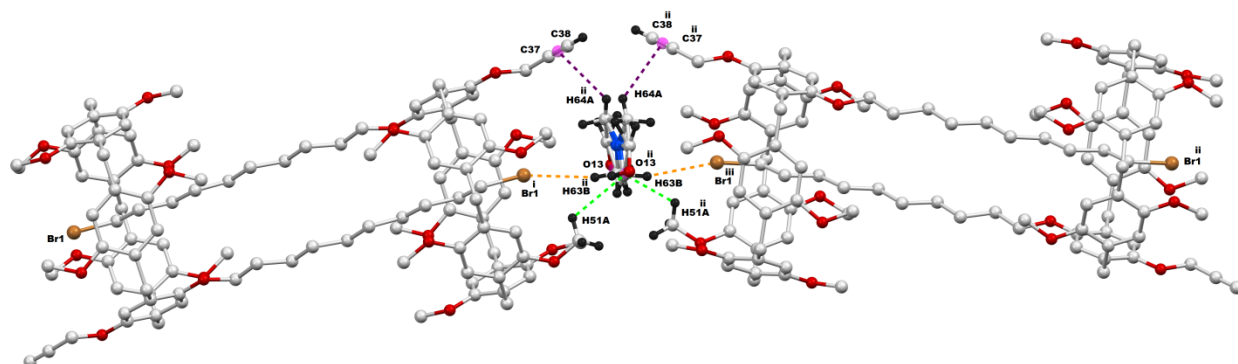

**Figure A.** Pillararene-DMF interaction in Pillar-D2 crystal when the crystal data is refined in space group C2/c. C-H...Br interactions are shown in brown, C-H... $\pi$  (C $\equiv$ C) are in purple and C-H... $\pi$  (C=O) are in green color respectively. Symmetry code: (i)  $-x, -y, 1-z$ ; (ii)  $1-x, y, \frac{1}{2}-z$  (iii)  $1+x, -y, -\frac{1}{2}+z$

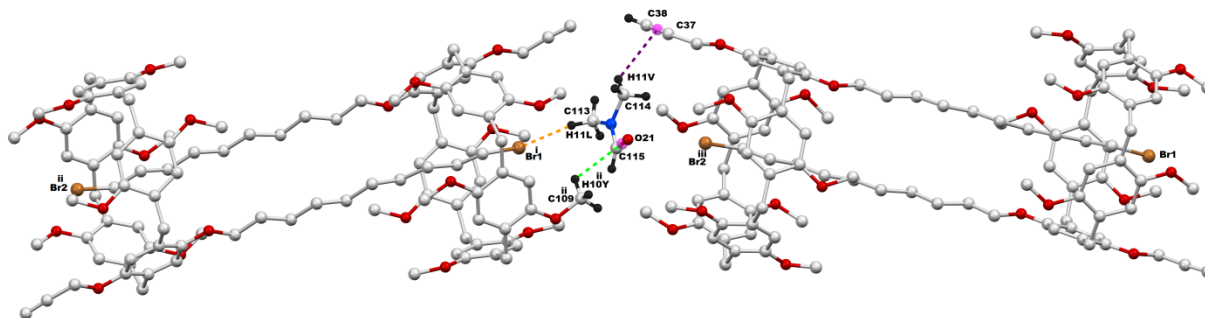

**Figure B.** Pillararene-DMF interaction in Pillar-D2 crystal when the crystal data is refined in space group Cc. C-H...Br interactions are shown in brown, C-H... $\pi$  (C $\equiv$ C) are in purple and C-H... $\pi$  (C=O) are in green color respectively. Symmetry code: (i)  $1+x, 1-y, -\frac{1}{2}+z$ ; (ii)  $x, 1-y, -\frac{1}{2}+z$  (iii)  $-1+x, y, z$

It is noteworthy that there is no interaction between the Br2 atom and the DMF molecule in Pillar-D2, which is refined in space group Cc. The minimum C-H...Br distance in this case is 3.319 Å (for C114-H11S...Br2iii) which is higher than the sum of the vdW radii (2.94 Å).. Also C-H... $\pi$  (C $\equiv$ C) interaction between DMF and C93 $\equiv$ C94 of pillararene as well as the expected C-H... $\pi$  (C=O) between the DMF and any nearby CH<sub>3</sub> fraction of asymmetric pillararene is found to be absent as the minimum distance observed in these cases are higher than the sum of the vdW radii. So the crystal data of **Pillar-D2** refined in space group Cc provides better idea about the supramolecular polymer formation of pillararene-DMF system compared to that of data refined in space group C2/c.

Therefore, in the present article, we used the crystal data refined in space group Cc for Pillar-D2 crystal. (the crystal data of Pillar -D2 in space group C2/c has also been deposited in CCDC and its deposition number is 2375228).

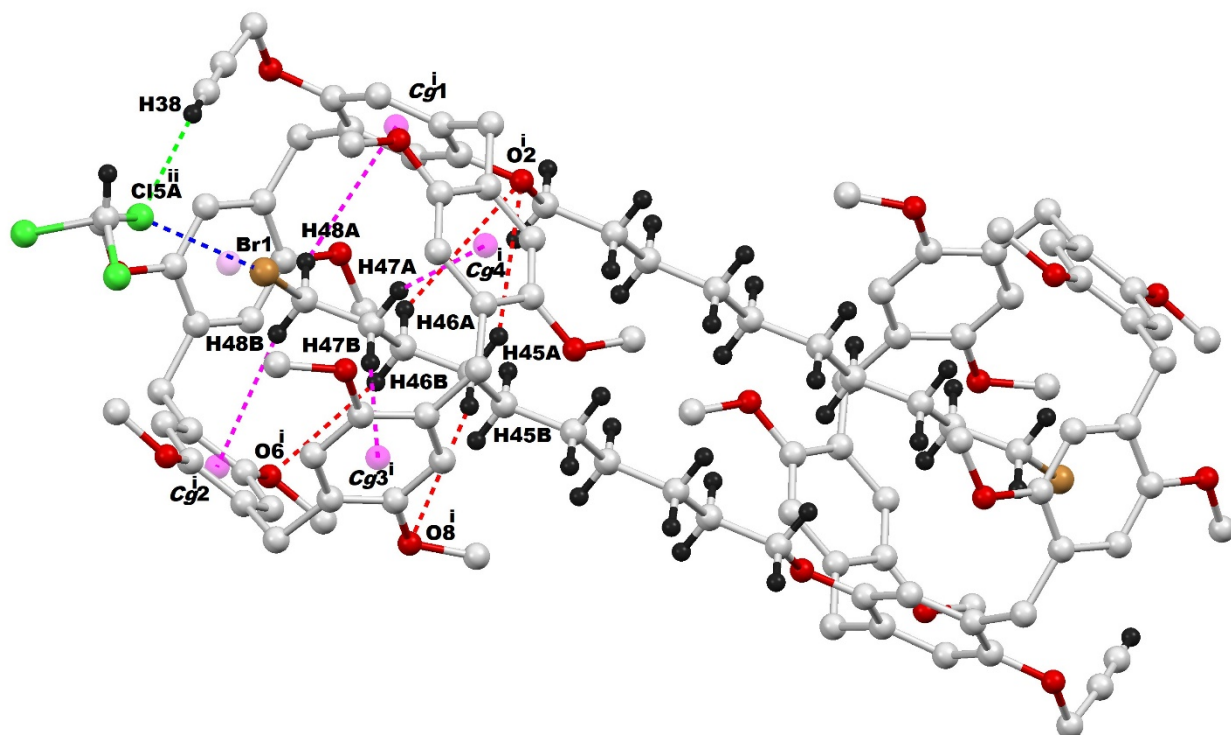

**Figure S5.** Possible noncovalent interactions in the crystal of **Pillar-D1**.

**Table S2.** Intermolecular non-bonding interactions (Å, °) in the **Pillar-D1** crystals which facilitated the formation of threaded dimer.

| A-B...C                      | A-B     | B...C   | B...C    | A-B...C  |
|------------------------------|---------|---------|----------|----------|
| C48 H48A...Cg1 <sup>i</sup>  | 0.99    | 3.311   | 4.125    | 140.66   |
| C48 H48B...Cg2 <sup>i</sup>  | 0.99    | 2.895   | 3.807    | 153.68   |
| C47 H47B...Cg3 <sup>i</sup>  | 0.99    | 2.898   | 3.873    | 168.42   |
| C47 H47A...Cg4 <sup>i</sup>  | 0.99    | 2.787   | 3.686    | 151.26   |
| C46 H46A...O2 <sup>i</sup>   | 0.99    | 3.484   | 4.096(9) | 122.1    |
| C46 H46B...O6 <sup>i</sup>   | 0.99    | 3.183   | 4.165(9) | 170.5    |
| C45 H45A...O2 <sup>i</sup>   | 0.99    | 3.229   | 4.00(1)  | 136.4    |
| C45 H45B...O8 <sup>i</sup>   | 0.99    | 3.211   | 4.09(1)  | 149.3    |
| C38 H38...C15A <sup>ii</sup> | 0.95    | 2.60    | 3.46(2)  | 151      |
| C48 Br1...C15A <sup>ii</sup> | 1.86(1) | 3.53(1) | 5.32(2)  | 160.4(4) |

Cg1 - Cg4 are the centroid of the pillararene phenyl rings constitute C1-C6, C15-C20, C22-27 and C29-C34 respectively; Symmetry code: (i) 2-x, -y, 1-z; (ii) 1+x, -1/2-y, 1/2+z

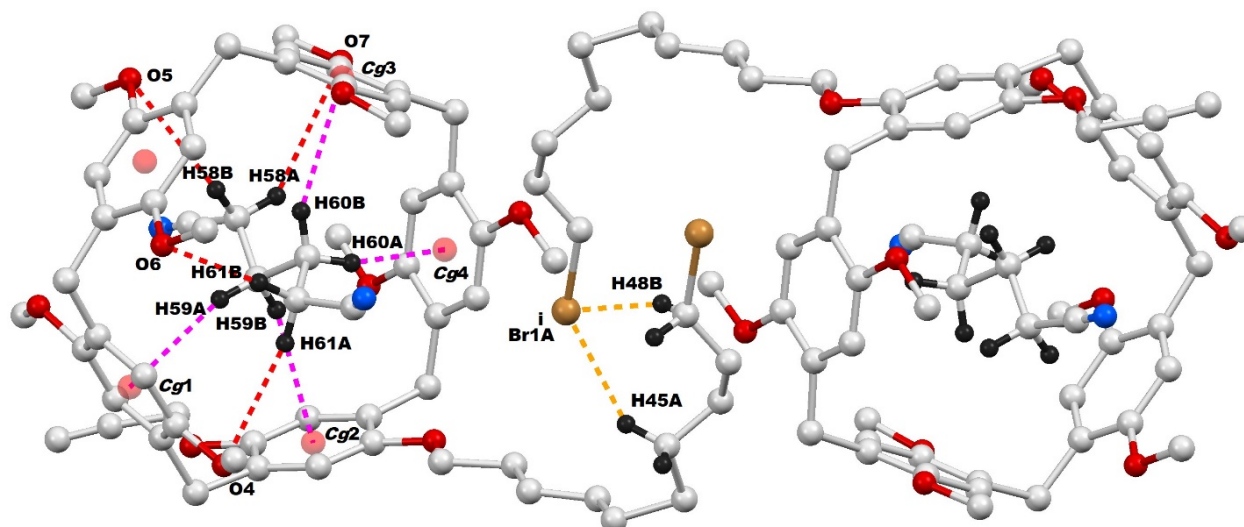

**Figure S6.** Possible noncovalent interactions in the crystal of [Pillar ⊃ ADN1].

**Table S3.** Intermolecular non-bonding interactions in the [Pillar ⊃ ADN1] crystals (Å, °) observed in the guest encapsulation site and tail-to tail bonds.

| A-B...C                       | A-B  | B...C | B...C   | A-B...C |
|-------------------------------|------|-------|---------|---------|
| C45A H45A...Br1A <sup>i</sup> | 0.99 | 2.948 | 3.81(3) | 146     |
| C48A H48B...Br1A <sup>i</sup> | 0.98 | 2.965 | 3.91(2) | 162     |
| C58 H58A...O7                 | 0.99 | 3.115 | 3.97(2) | 146     |
| C58 H58B...O5                 | 0.99 | 2.961 | 3.88(2) | 155     |
| C59A H59A...Cg1               | 0.99 | 2.803 | 3.642   | 143.14  |
| C59A H59B...Cg2               | 0.99 | 2.915 | 3.877   | 165.37  |
| C60A H60B...Cg3               | 0.99 | 2.839 | 3.722   | 148.78  |
| C60A H60A...Cg4               | 0.99 | 2.882 | 3.767   | 149.25  |
| C61 H61A...O4                 | 0.99 | 2.998 | 3.78(3) | 136     |
| C61 H61B...O6                 | 0.99 | 3.186 | 4.13(2) | 160     |

Cg1 - Cg4 are the centroid of the pillararene phenyl rings constitute C1-C6, C8-C13, C22-27 and C29-C34 respectively; Symmetry code: (i)-1-x, 1-y, 1-z.

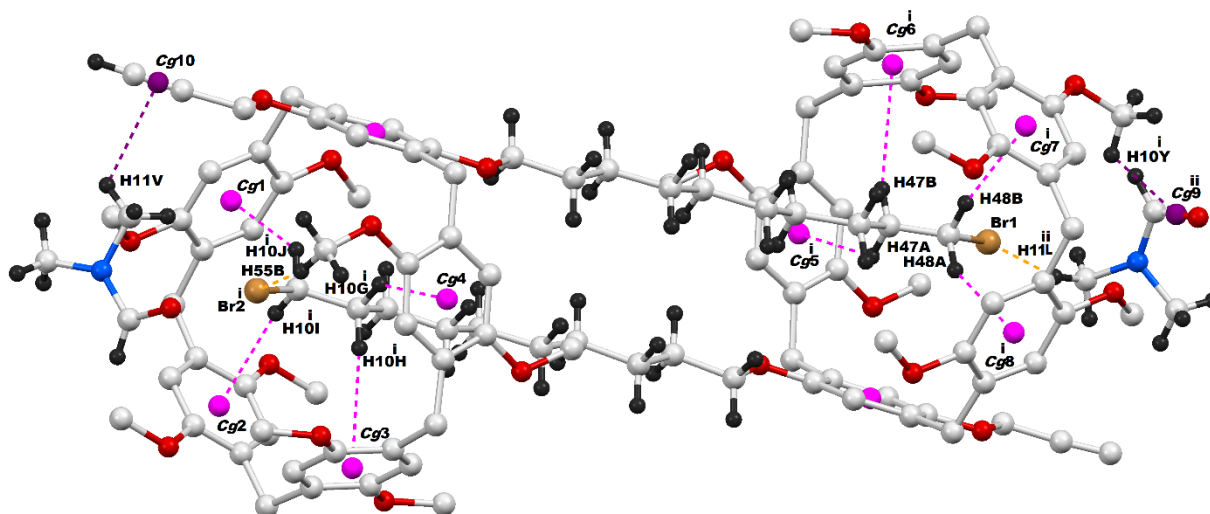

**Figure S7.** Possible noncovalent interactions in the crystal of **Pillar-D2**.

**Table S4.** Intermolecular non-bonding interactions (Å, °) in the **Poly(Pillar-D2)** crystals which facilitated the formation of polymeric threaded dimer.

| A-B...C                                         | A-B   | B...C | B...C    | A-B...C |
|-------------------------------------------------|-------|-------|----------|---------|
| C47-H47A...Cg5 <sup>i</sup>                     | 0.99  | 3.062 | 3.702    | 123.59  |
| C47-H47B...Cg6 <sup>i</sup>                     | 0.99  | 2.994 | 3.949    | 162.24  |
| C48-H48A...Cg8 <sup>i</sup>                     | 0.99  | 2.707 | 3.608    | 151.51  |
| C48-H48B...Cg7 <sup>i</sup>                     | 0.99  | 2.686 | 3.668    | 171.56  |
| C113 <sup>iii</sup> -H11L <sup>iii</sup> ...Br1 | 0.98  | 2.822 | 3.76(2)  | 161.2   |
| C103-H10G...Cg4 <sup>ii</sup>                   | 0.99  | 2.956 | 3.735    | 136.40  |
| C103-H10H...Cg3 <sup>ii</sup>                   | 0.99  | 2.952 | 3.939    | 174.71  |
| C104-H10I...Cg2 <sup>ii</sup>                   | 0.99  | 2.844 | 3.812    | 166.19  |
| C104-H10J...Cg1 <sup>ii</sup>                   | 0.99  | 2.779 | 3.504    | 130.59  |
| C55 <sup>ii</sup> -H55B <sup>ii</sup> ...Br2    | 0.979 | 3.118 | 3.977(9) | 147.2   |
| C109-H10Y...Cg9 <sup>iv</sup>                   | 0.98  | 2.827 | 3.382    | 116.72  |
| C114-H11V...Cg10                                | 0.98  | 2.800 | 3.411    | 121.08  |

Cg1 – Cg8 are the centroid of the pillararene phenyl rings constitute C8-C13, C15-C20, C22-27, C29-C34, C64-C69, C71-C76, C78-C83 and C85-C90 respectively; Cg9 & Cg10 are the centroids of C115=O21 and C37=C38 double bonds respectively. Symmetry code: (i) -1+x, -y, z; (ii) 1+x, y, z (iii) -1+x, 1-y, ½+z (iv) x, 1-y, ½+z

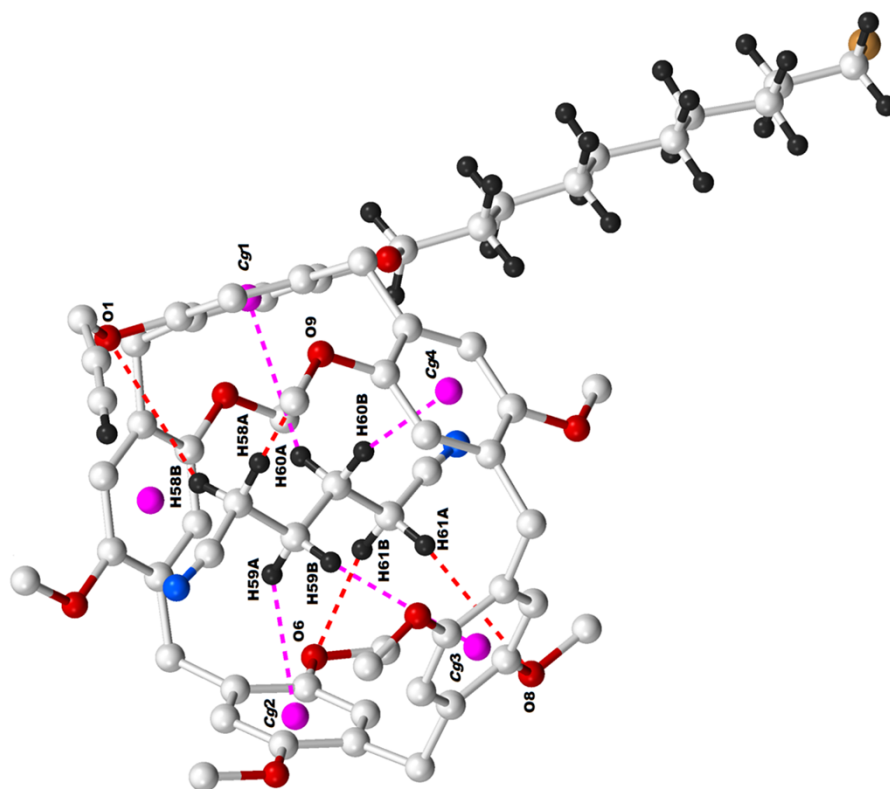

**Figure S8.** Possible noncovalent interactions between Pillararene host and encapsulated adiponitrile in the crystal of [Pillar  $\supset$  ADN2]. Cg1 - Cg4 are the centroid of the pillararene phenyl rings constitute C1-C6, C15-C20, C22-27 and C29-C34 respectively.

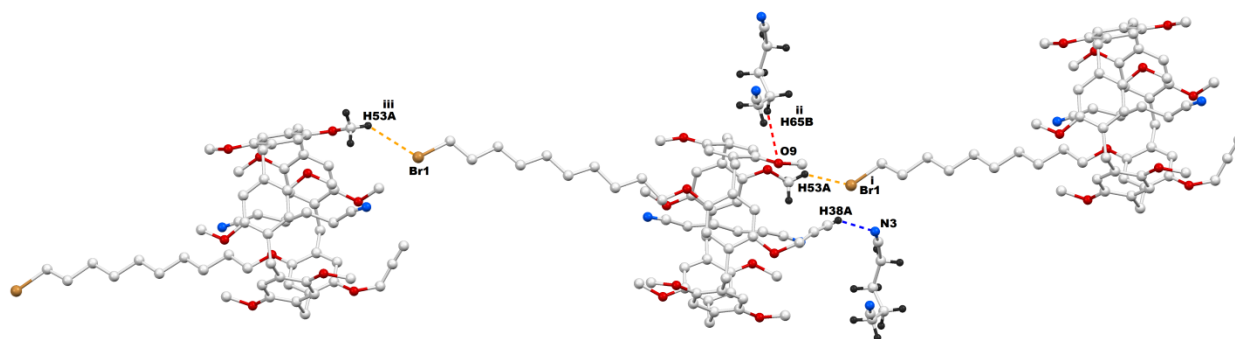

**Figure S9.** Possible noncovalent interactions of pillararene with adjacent pillararenes and the void filling adiponitrile molecules in the crystal of [Pillar  $\supset$  ADN2]. Symmetry code: (i)  $1/2+x, 1/2-y, 1/2+z$ ; (ii)  $1.5-x, -1/2+y, 1.5-z$ . (iii)  $-1/2+x, 1/2-y, -1/2+z$ .

**Table S6.** Intermolecular non-bonding interactions in the [Pillar  $\supset$  ADN2] crystals ( $\text{\AA}$ ,  $^\circ$ ) observed in the Pillar-Adiponitrile and Pillar-Pillar bonds.

| <b>A-B...C</b>                             | <b>A-B</b> | <b>B...C</b> | <b>B...C</b> | <b>A-B...C</b> |
|--------------------------------------------|------------|--------------|--------------|----------------|
| C58 H58A...O9                              | 0.99       | 2.936        | 3.92(1)      | 171.3          |
| C58 H58B...O1                              | 0.99       | 3.103        | 3.90(1)      | 138.2          |
| C59 H59A...Cg2                             | 0.99       | 3.072        | 3.928        | 145.51         |
| C59 H59B...Cg3                             | 0.99       | 3.084        | 3.982        | 151.69         |
| C60 H60A...Cg1                             | 0.99       | 3.087        | 3.765        | 126.90         |
| C60 H60B...Cg4                             | 0.99       | 2.939        | 3.890        | 161.29         |
| C61 H61A...O8                              | 0.99       | 3.012        | 3.87(1)      | 145.7          |
| C61 H61B...O6                              | 0.99       | 3.110        | 4.07(1)      | 164.2          |
| C38A H38A...N3                             | 0.95       | 1.96         | 2.61(2)      | 124            |
| C53 H53A...Br1 <sup>i</sup>                | 0.98       | 3.027        | 3.817(7)     | 138.6          |
| C65 <sup>ii</sup> H65B <sup>ii</sup> ...O9 | 0.99       | 2.724        | 3.56(2)      | 141.8          |

Cg1 - Cg4 are the centroid of the pillararene phenyl rings constitute C1-C6, C15-C20, C22-27 and C29-C34 respectively; Symmetry code: (i)  $1/2+x, 1/2-y, 1/2+z$ ; (ii)  $1.5-x, -1/2+y, 1.5-z$ .

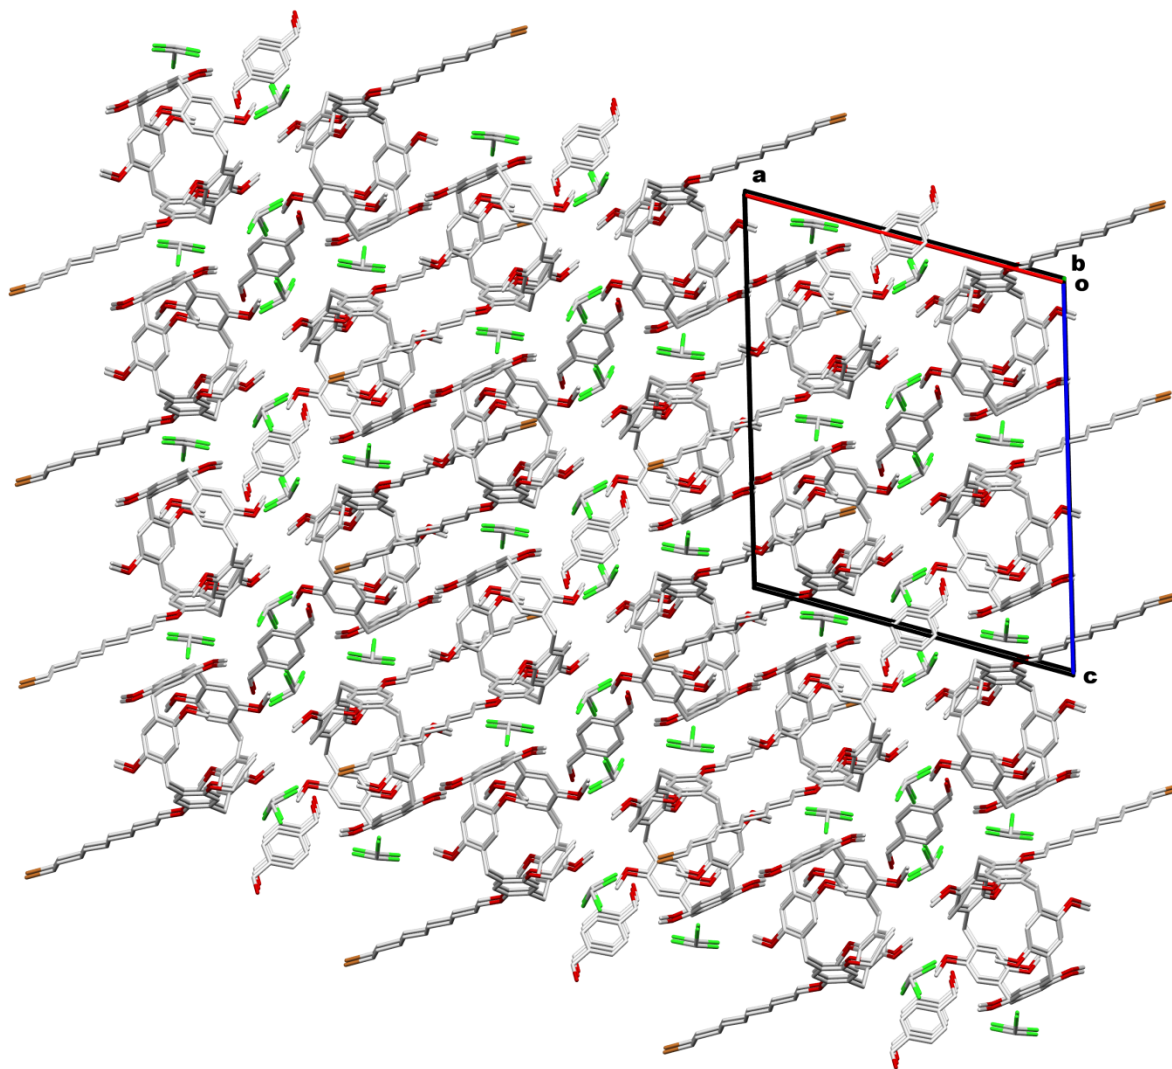

**Figure S10.** Packing diagrams of **Pillar-D1**



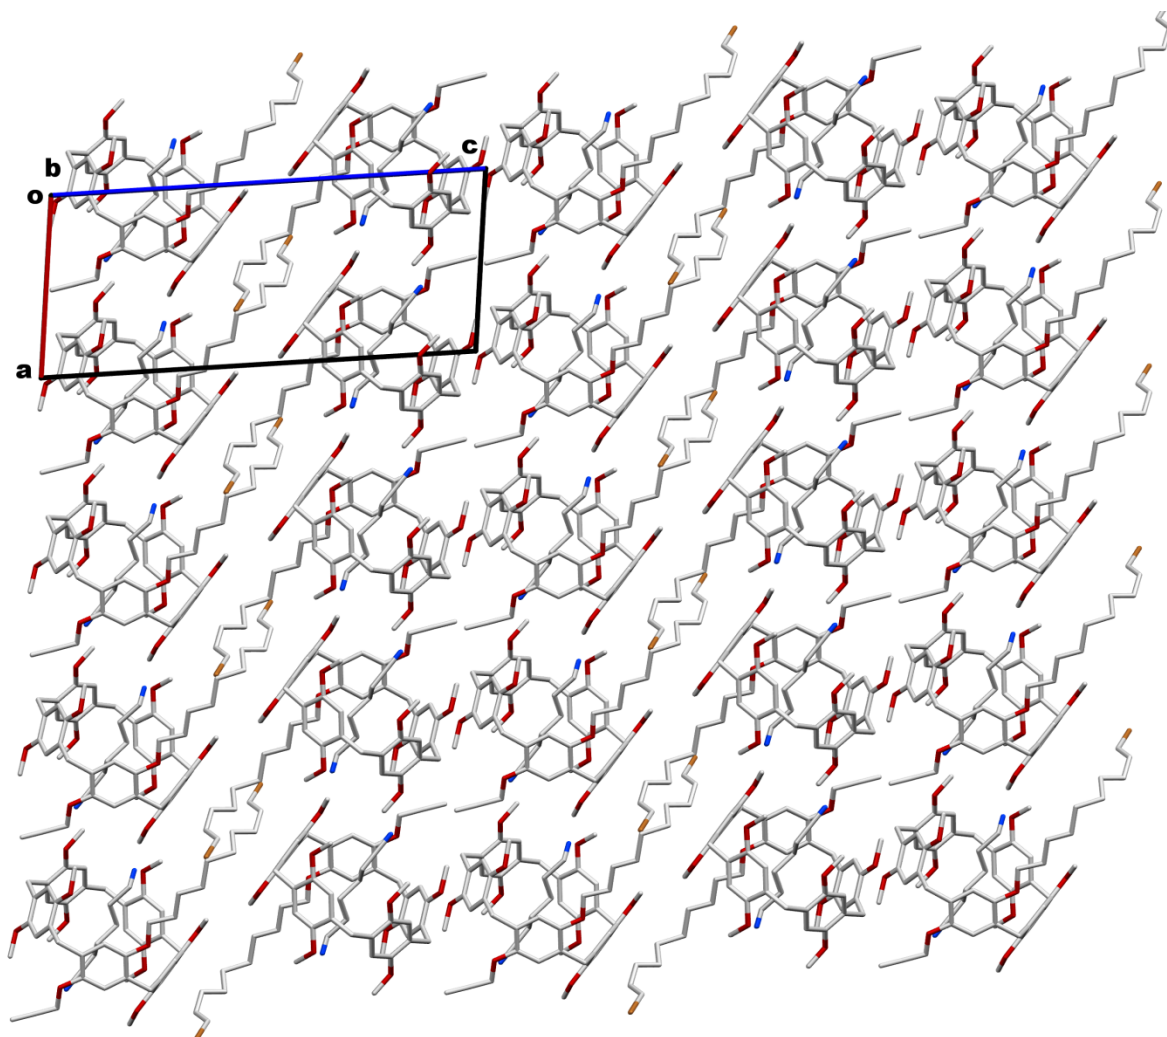

**Figure S11.** Packing diagrams of **Pillar-ADN1**

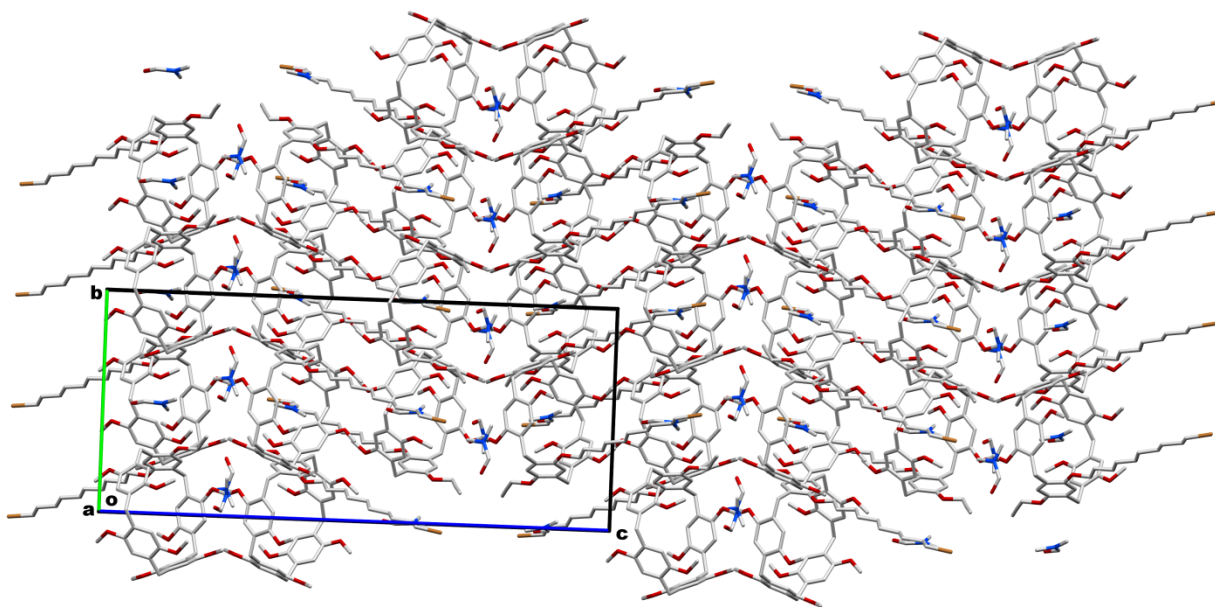

**Figure S12.** Packing diagrams of **Pillar-D2**

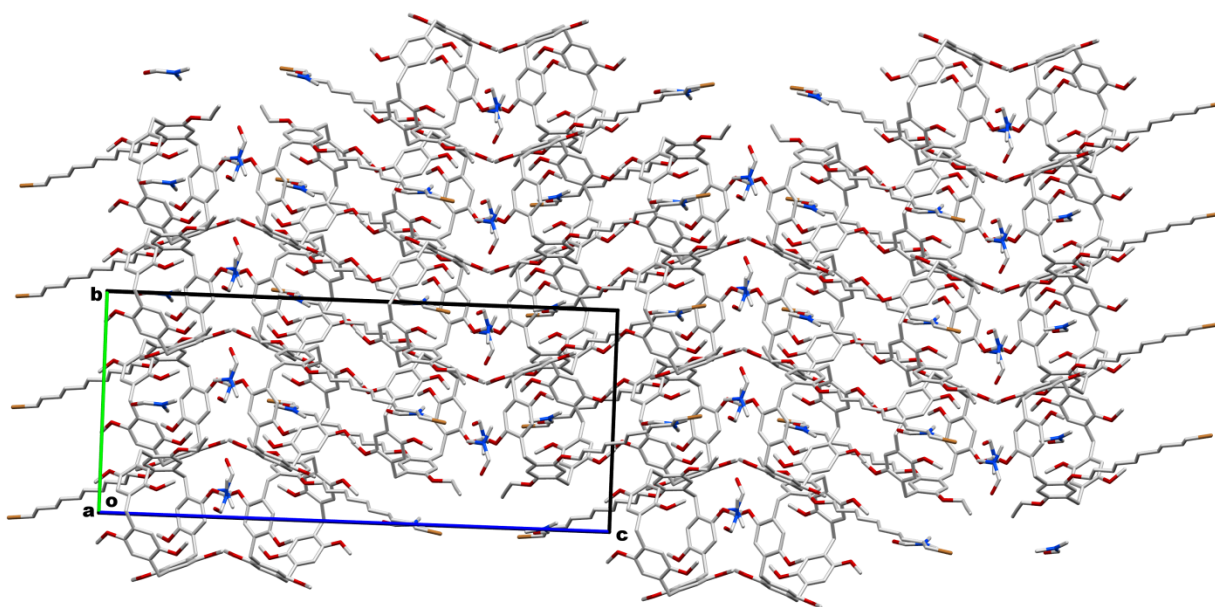

**Figure S13.** Packing diagrams of **Pillar-ADN2**

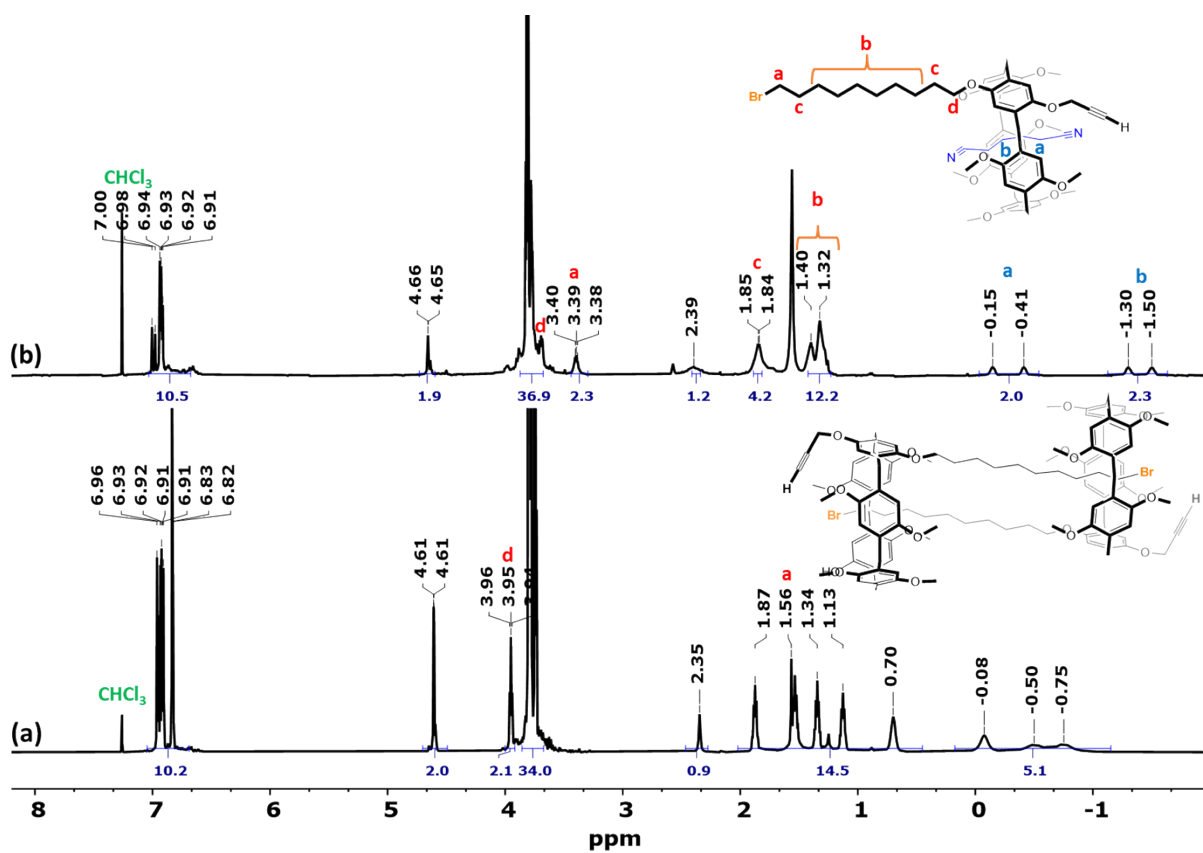

**Figure S14.**  $^1\text{H}$  NMR spectra (600 MHz,  $\text{CDCl}_3$  at 298 K) of Pillar-D1 (a), and  $[\text{Pillar-D1}] \supset \text{ADN1}$  (b).

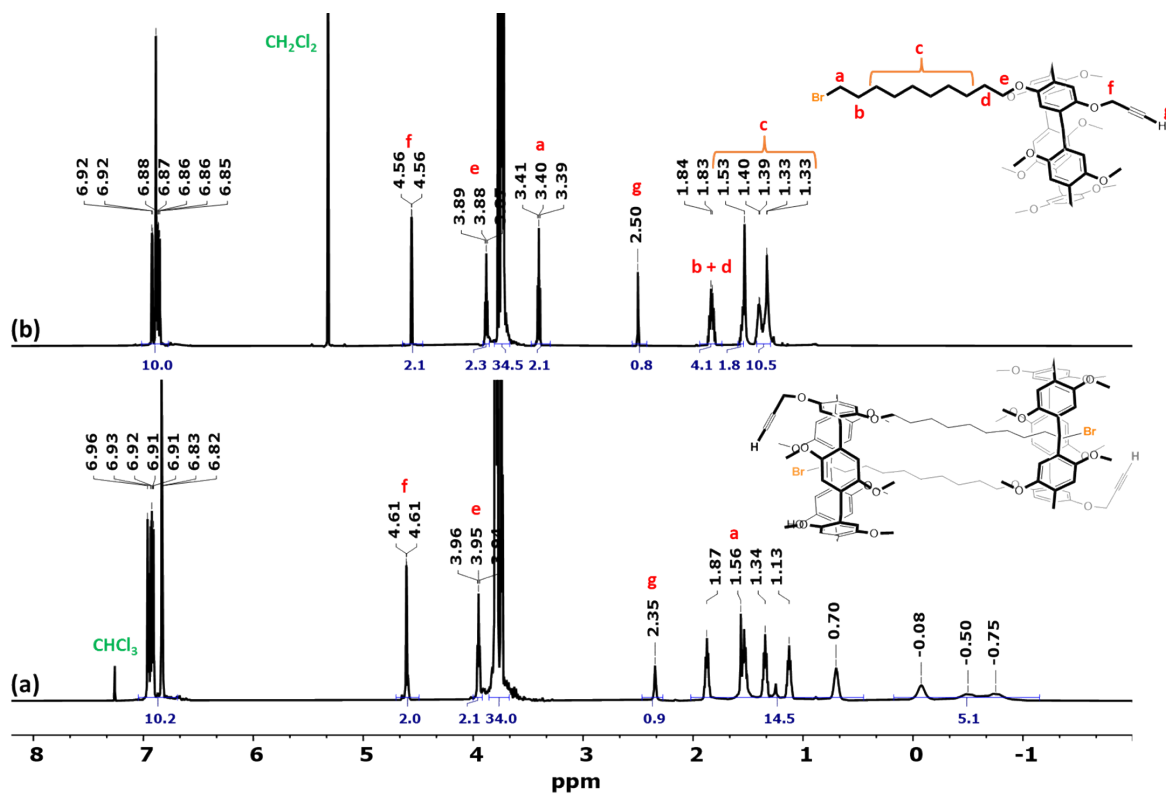

Figure S15.  $^1\text{H}$  NMR spectra (600 MHz, 298 K) of the Pillar-D1 [2c] daisy chain recorded in (a)  $\text{CDCl}_3$  and (b)  $\text{CD}_2\text{Cl}_2$ .

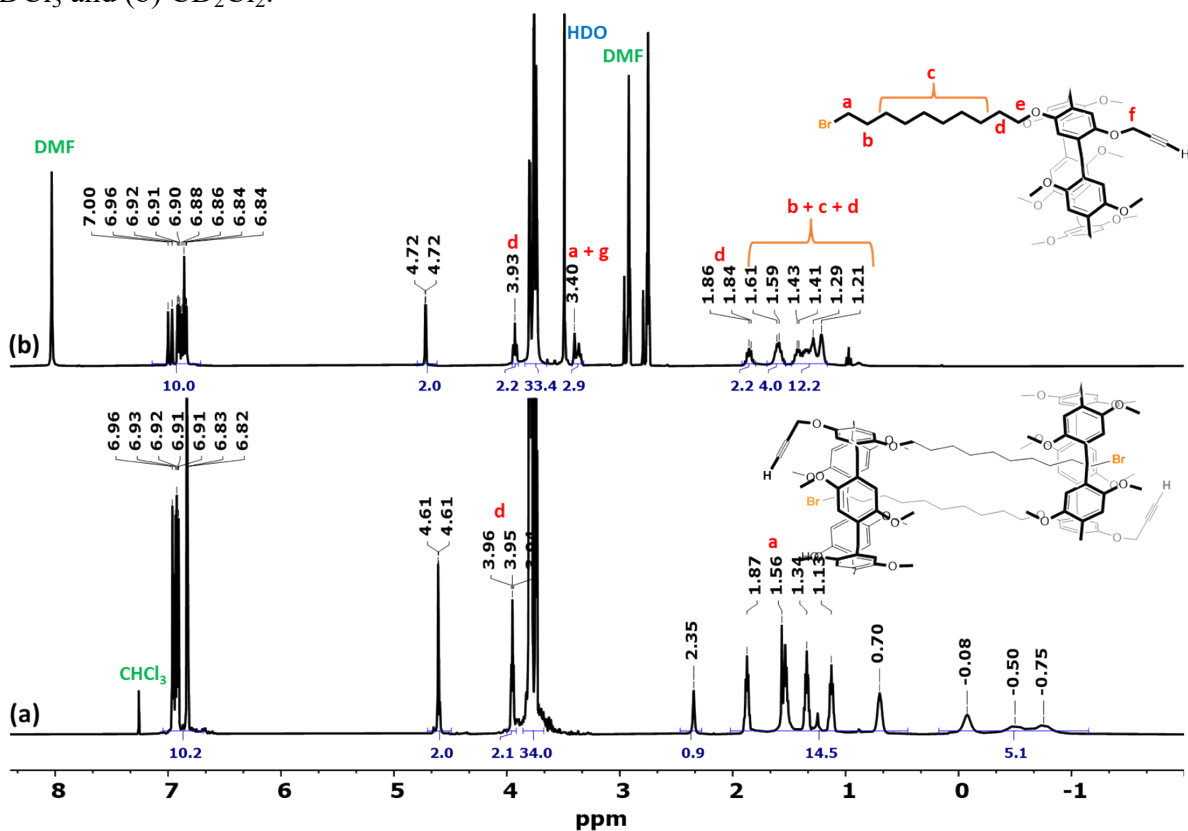

Figure S16.  $^1\text{H}$  NMR (600 MHz, 298 K) spectra of Pillar-D1 in  $\text{CDCl}_3$  (a), and  $\text{DMF-d}_7$  (b).

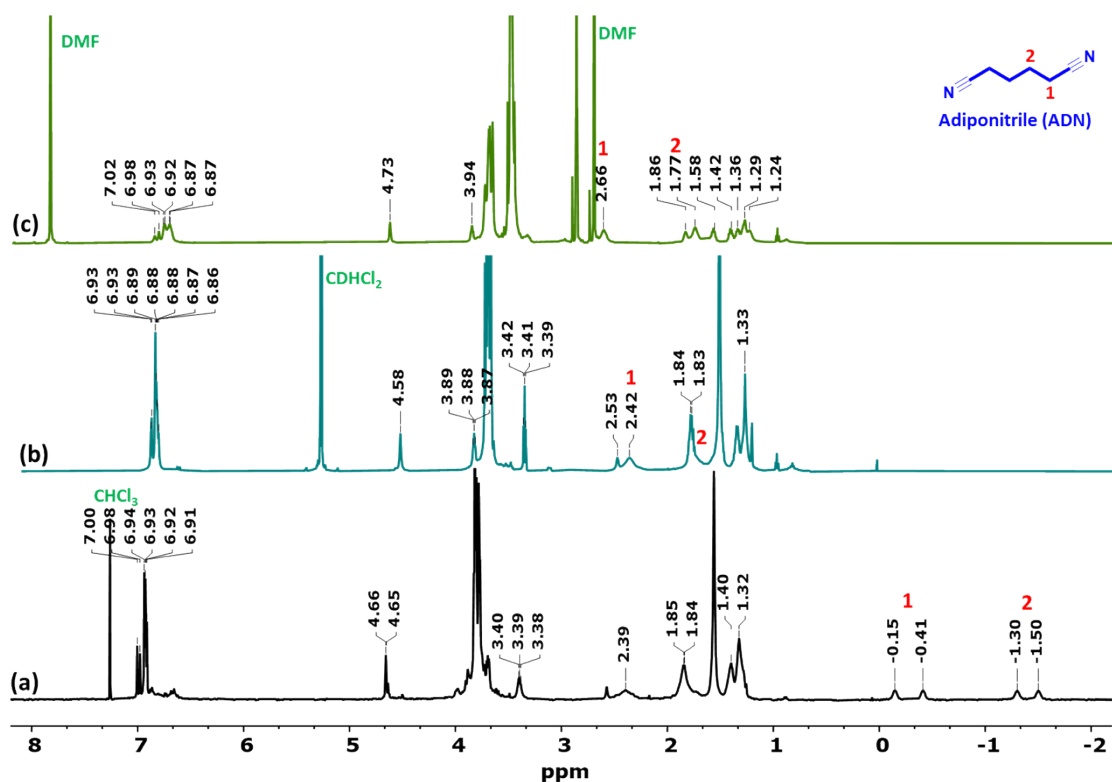

**Figure S17.**  $^1\text{H NMR}$  (600 MHz, 298 K) spectra of equimolar solution of **Pillar** with adiponitrile (ADN) in  $\text{CDCl}_3$  (a),  $\text{CD}_2\text{Cl}_2$  (b) and  $\text{DMF-}d_7$  (c).

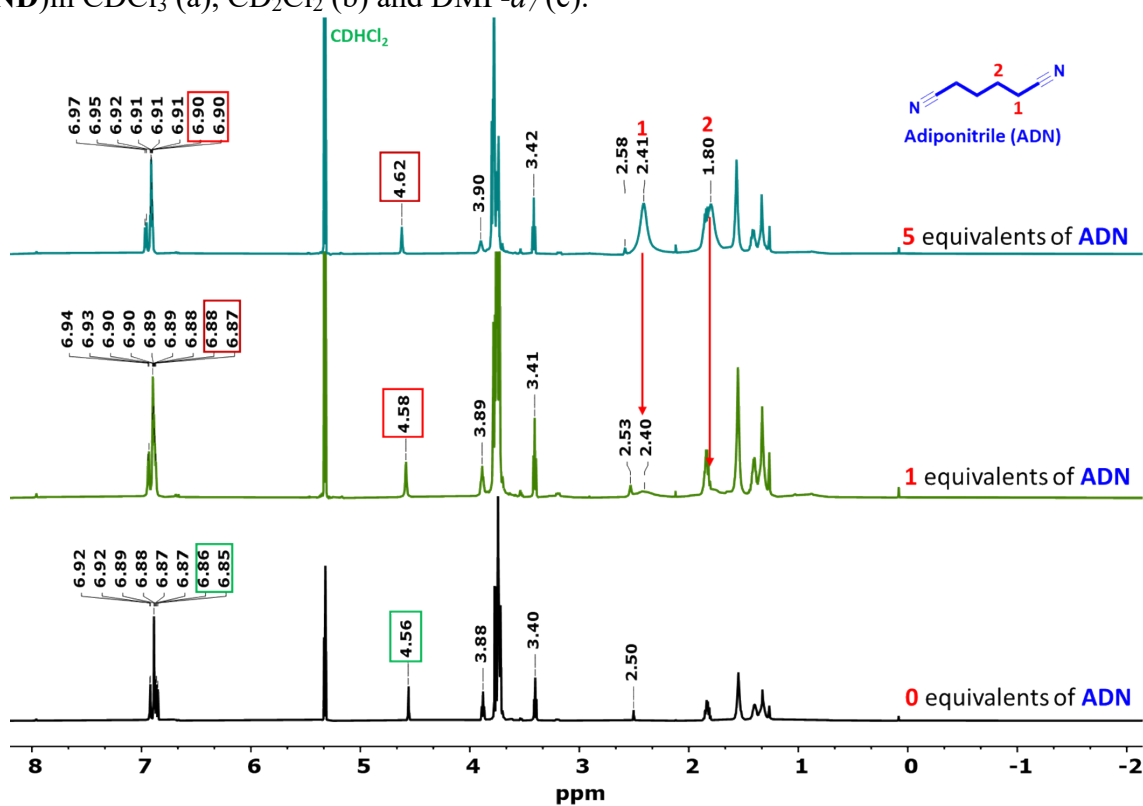

**Figure S18.**  $^1\text{H NMR}$  (600 MHz,  $\text{CD}_2\text{Cl}_2$  at 298 K) spectra of **Pillar** with different concentrations of adiponitrile (ADN).

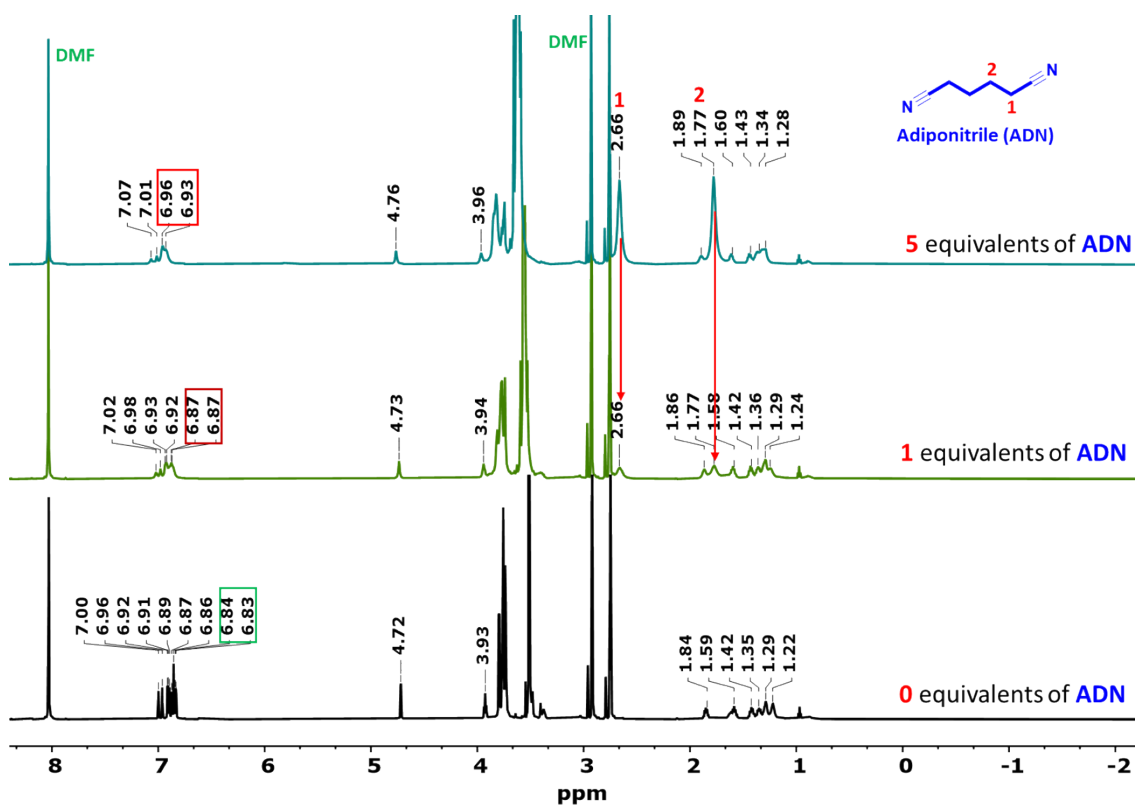

**Figure S19.**  $^1\text{H NMR}$  (600 MHz,  $\text{DMF-d}_7$  at 298 K) spectra of **Pillar** with different concentrations of adiponitrile (ADN).

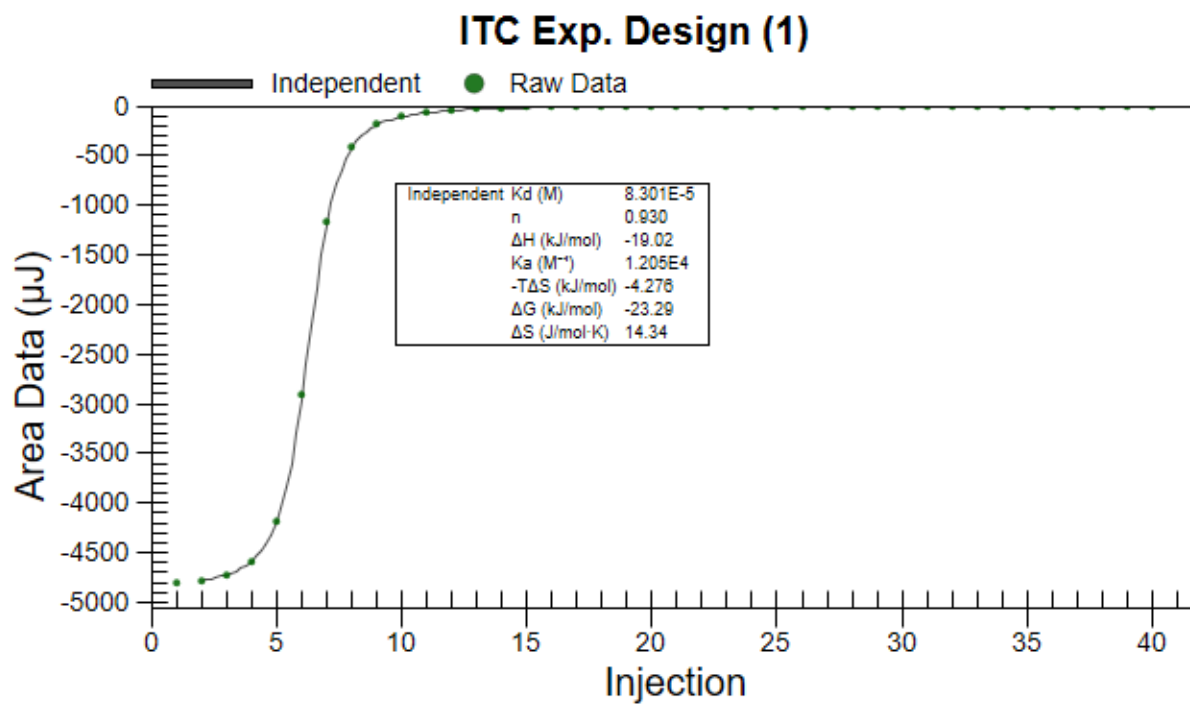

**Figure S20.** Net heat of complexation in chloroform of 10 mM solution of **Pillar** with adiponitrile as a function of injection after subtracting heat of dilution.

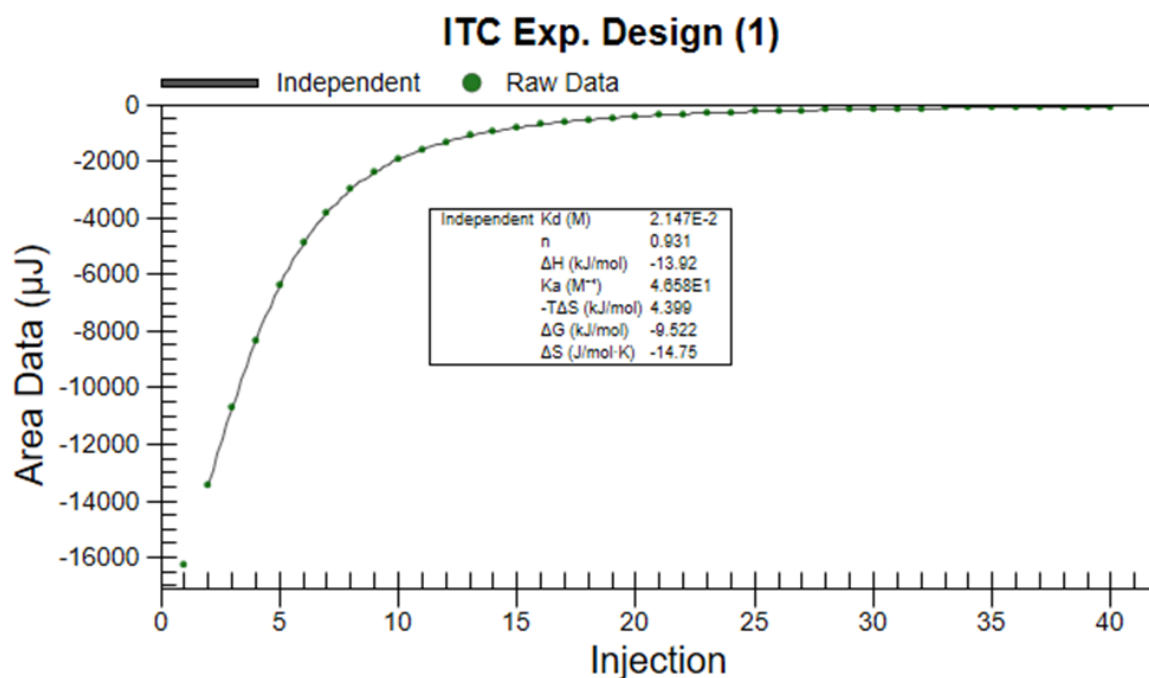

**Figure S21.** Net heat of complexation in *N,N*-dimethylformamide (DMF) of 10 mM solution of **Pillar** with **adiponitrile** as a function of injection after subtracting heat of dilution.

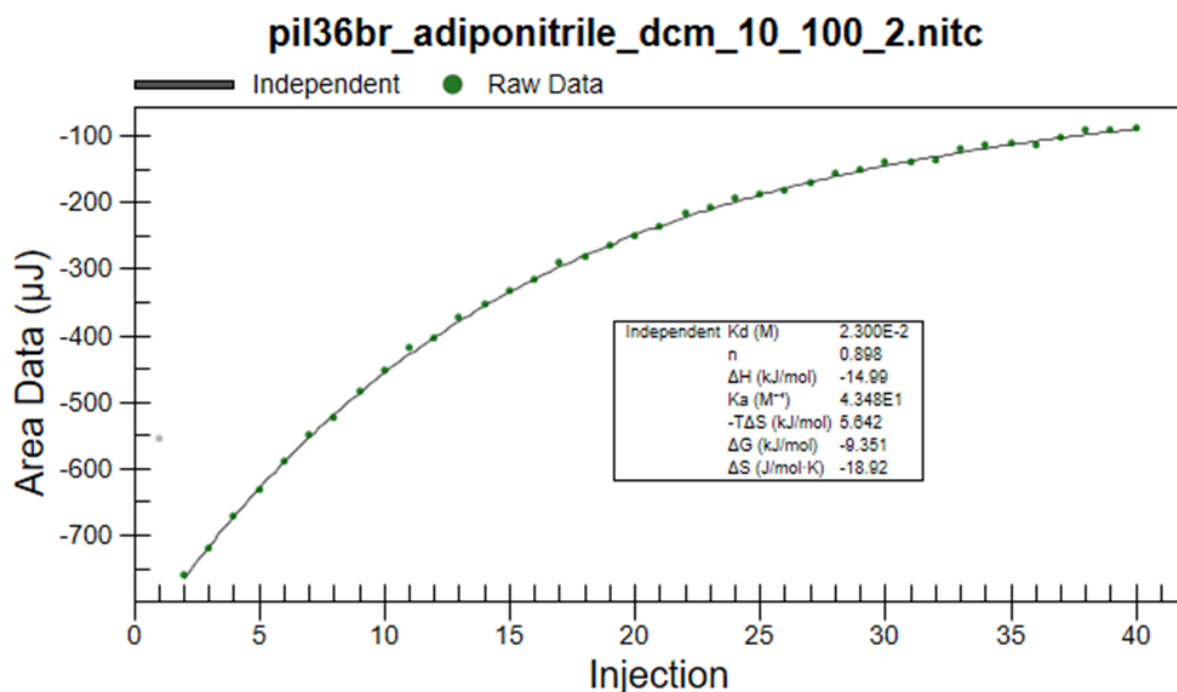

**Figure S22.** Net heat of complexation in **dichloromethane (DCM)** of 10 mM solution of **Pillar** with **adiponitrile** as a function of injection after subtracting heat of dilution.

**References**

1. G. M. Sheldrick, *Acta Cryst.* 2015, **C71**, 3-8.
